# Supplementary material for: Kinetic and mechanistic aspects of solid state, nanostructured porphyrin diacid photosensitizers in photooxidation of sulfides
Source: Royal Society of Chemistry journal article supplement (doi:10.1039/c8cy02433b), 2019-01-01
Supplement: c8cy02433b1.pdf [file c8cy02433b1.pdf]

**Electronic Supplementary Information**  
**for**  
**Kinetic and mechanistic aspects of solid state, nanostructured porphyrin diacid**  
**photosensitizers in photooxidation of sulfides**

Rahele Nasrollahi, Akram Heydari-turkmani, Saeed Zakavi\*

Department of Chemistry, Institute for Advanced Studies in Basic Sciences (IASBS), Zanjan  
45137-66731, Iran.

\*Email: [zakavi@iasbs.ac.ir](mailto:zakavi@iasbs.ac.ir)

**S1.**  $^1\text{H}$  NMR,  $^{13}\text{C}$  NMR and UV-Vis spectral data of the used porphyrins

**S2.** Experimental setup for the photooxidation reactions

**S3.** Procedures for the oxidation of different sulfides and characterization of the oxidation products

**S4.** The results of EDX elemental analysis of  $\text{H}_2\text{T}(2\text{-Cl})\text{PP}@ \text{nanoAmb}$

**S5.** The change in the UV-vis spectrum of DPBF upon irradiation with a 10W red LED lamp in the presence of the immobilized porphyrins.

**S6.** Photooxidation of different *para*-substituted phenyl methyl sulfides by  $\text{H}_2\text{TPP}@ \text{nanoAmb}$ .

**S1:**  $^1\text{H}$  NMR,  $^{13}\text{C}$  NMR and UV-Vis spectral data of the used porphyrins

**$\text{H}_2\text{TTPP}$ .**  $^1\text{H}$  NMR (400 MHz,  $\text{CDCl}_3$ , TMS),  $\delta/\text{ppm}$ : -2.77 (2H, br, s, NH), 7.77-7.84 (8 $\text{H}_\text{m}$  and 4 $\text{H}_{\text{p,m}}$ ), 8.26-8.27 (8 $\text{H}_\text{o}$ , d), 8.90 (8 $\text{H}_\beta$ , s);  $^{13}\text{C}$  NMR ( $\sim 100$  MHz,  $\text{CDCl}_3$ , TMS),  $\delta/\text{ppm}$ : 120.18 ( $\text{C}_{\text{meso}}$ ), 142.20 ( $\text{C}_1$ ), 134.60 ( $\text{C}_2$ ,  $\text{C}_6$ ), 126.73 ( $\text{C}_3$ ,  $\text{C}_5$ ), 127.75 ( $\text{C}_4$ ), 131.5 ( $\text{C}_\beta$ ); UV-vis in  $\text{CH}_2\text{Cl}_2$ ,  $\lambda_{\text{max}}/\text{nm}$  ( $\log\epsilon$ ): 417 (5.79), 513 (4.58), 548 (4.38), 590 (4.30), 647 (4.29).

**$\text{H}_2\text{T(2-Me)PP}$ .**  $^1\text{H}$  NMR (400 MHz,  $\text{CDCl}_3$ , TMS),  $\delta/\text{ppm}$ : -2.59 (2H, br, s, NH), 7.54-7.74 (8 $\text{H}_\text{m}$  and 4 $\text{H}_{\text{p,m}}$ , meta and para position relative to C atom attached to meso position), 7.99-8.11 (4 $\text{H}_\text{o}$ , m, ortho-position relative to C atom attached to meso position), 8.70 (8 $\text{H}_\beta$ , s), 2.01-2.11 (12 $\text{H}_{\text{Me}}$ , m);  $^{13}\text{C}$  NMR ( $\sim 100$  MHz,  $\text{CDCl}_3$ , TMS),  $\delta/\text{ppm}$ : 118.82 ( $\text{C}_{\text{meso}}$ ), 139.54 ( $\text{C}_1$ ), 139.63 ( $\text{C}_2$ ), 128.38 ( $\text{C}_3$ ), 129.22 ( $\text{C}_4$ ), 124.21 ( $\text{C}_5$ ), 133.90 ( $\text{C}_6$ ), 141.48 ( $\text{C}_\alpha$ ), 129.22 ( $\text{C}_\beta$ ), 21.37 ( $\text{C}_{\text{Me}}$ ); UV-vis in  $\text{CH}_2\text{Cl}_2$ ,  $\lambda_{\text{max}}/\text{nm}$  ( $\log\epsilon$ ): 416 (6.04), 512 (4.74), 545 (4.34), 589 (4.34), 645 (4.25).

**$\text{H}_2\text{T(2-Cl)PP}$ .**  $^1\text{H}$  NMR (400MHz,  $\text{CDCl}_3$ , TMS),  $\delta/\text{ppm}$ : -2.62 (2H, br, s, NH), 7.66-7.87 (8 $\text{H}_\text{m}$  and 4 $\text{H}_{\text{p,m}}$ , meta and para position relative to C atom attached to meso position), 8.10-8.26 (4 $\text{H}_\text{o}$ , m, ortho-position relative to C atom attached to meso position), 8.72 (8 $\text{H}_\beta$ , s);  $^{13}\text{C}$  NMR ( $\sim 100$  MHz,  $\text{CDCl}_3$ , TMS),  $\delta/\text{ppm}$ : 116.76 ( $\text{C}_{\text{meso}}$ ), 137.10 ( $\text{C}_1$ ), 136.94 ( $\text{C}_2$ ), 129.01 ( $\text{C}_3$ ), 129.93 ( $\text{C}_4$ ), 125.32 ( $\text{C}_5$ ), 135.52 ( $\text{C}_6$ ), 140.50 ( $\text{C}_\alpha$ ), 135.39 ( $\text{C}_\beta$ ); UV-vis in  $\text{CH}_2\text{Cl}_2$ ,  $\lambda_{\text{max}}/\text{nm}$  ( $\log\epsilon$ ): 416 (5.64), 512 (4.47), 543(4.07), 587 (4.15), 643 (3.96).

**$\text{H}_2\text{T(4-Cl)PP}$ .**  $^1\text{H}$  NMR (400 MHz,  $\text{CDCl}_3$ , TMS),  $\delta/\text{ppm}$ : -2.83 (2H, br, s, NH), 7.77-7.79 (8 $\text{H}_\text{m}$ , d), 8.15-8.17 (8 $\text{H}_\text{o}$ , d), 8.87(8 $\text{H}_\beta$ , s);  $^{13}\text{C}$  NMR ( $\sim 100$  MHz,  $\text{CDCl}_3$ , TMS),  $\delta/\text{ppm}$ : 119.01 ( $\text{C}_{\text{meso}}$ ), 140.37 ( $\text{C}_1$ ), 135.52 ( $\text{C}_2$ ,  $\text{C}_6$ ), 127.07 ( $\text{C}_3$ ,  $\text{C}_5$ ), 134.41( $\text{C}_4$ ), 131.64 ( $\text{C}_\beta$ ); UV-vis in  $\text{CH}_2\text{Cl}_2$ ,  $\lambda_{\text{max}}/\text{nm}$  ( $\log\epsilon$ ): 418 (5.79), 513 (4.52), 547 (4.25), 590 (4.16), 647 (4.10).

**$\text{H}_2\text{T(4-OMe)PP}$ .**  $^1\text{H}$  NMR (400 Hz,  $\text{CDCl}_3$ , TMS),  $\delta/\text{ppm}$ : -2.72 (2H, br, s, NH), 7.29-7.32 (8 $\text{H}_\text{m}$ , d), 8.15-8.17 (8 $\text{H}_\text{o}$ , d), 8.89(8 $\text{H}_\beta$ , s), 4.13 (12 $\text{H}_{\text{Me}}$ , s);  $^{13}\text{C}$  NMR ( $\sim 100\text{MHz}$ ,  $\text{CDCl}_3$ , TMS),  $\delta/\text{ppm}$ : 119.75 ( $\text{C}_{\text{meso}}$ ), 134.67 ( $\text{C}_1$ ), 135.62 ( $\text{C}_2$ ,  $\text{C}_6$ ), 112.20 ( $\text{C}_3$ ,  $\text{C}_5$ ), 159.39 ( $\text{C}_4$ ), 131.34 ( $\text{C}_\beta$ ), 55.61 ( $\text{C}_{\text{Me}}$ ); UV-vis in  $\text{CH}_2\text{Cl}_2$ ,  $\lambda_{\text{max}}/\text{nm}$  ( $\log\epsilon$ ): 421 (5.61), 517 (4.32), 555 (4.22), 593 (4.06), 651 (4.11).

**H<sub>2</sub>T(4-Me)PP.** <sup>1</sup>H NMR (400 MHz, CDCl<sub>3</sub>, TMS), δ/ppm: -2.76 (2H, br, s, NH), 7.55-7.58 (8H<sub>m</sub>, d), 8.09-8.12 (8H<sub>o</sub>, d), 8.86(8H<sub>β</sub>, s), 2.65 (12H<sub>Me</sub>, s); <sup>13</sup>C NMR (~100 MHz, CDCl<sub>3</sub>, TMS), δ/ppm: 120.47 (C<sub>meso</sub>), 139.73 (C<sub>1</sub>), 134.92 (C<sub>2</sub>, C<sub>6</sub>), 127.81 (C<sub>3</sub>, C<sub>5</sub>), 137.71 (C<sub>4</sub>), 131.37 (C<sub>β</sub>), 21.57 (C<sub>Me</sub>); UV-vis in CH<sub>2</sub>Cl<sub>2</sub>, λ<sub>max</sub>/nm (logε): 418 (5.89), 516 (4.54), 551 (4.34), 590(4.18), 647 (4.20).

**H<sub>4</sub>TPP(HSO<sub>4</sub>)<sub>2</sub>.** <sup>1</sup>H NMR (400 MHz, CDCl<sub>3</sub>, TMS), δ/ppm: 7.984-8.074 (8H<sub>m</sub> and 4H<sub>p</sub>, m), 8.626-8.663 (8H<sub>o</sub>, m), 8.626-8.663 (8H<sub>β</sub>, m), no signal was observed for the NH protons at 20 °C.; <sup>13</sup>C NMR (400MHz, CDCl<sub>3</sub>, TMS), δ/ppm: 122.63 (C<sub>meso</sub>), 139.93 (C<sub>1</sub>), 139.05 (C<sub>2</sub>, C<sub>6</sub>), 128.12 (C<sub>3</sub>, C<sub>5</sub>), 130.01 (C<sub>4</sub>), 146.05 (C<sub>α</sub>), 128.40(C<sub>β</sub>); UV-vis in CH<sub>2</sub>Cl<sub>2</sub>, λ<sub>max</sub>/nm (logε): 445 (5.70), 611 (3.43), 662 (3.77).

## S2. Experimental setup for the photooxidation reactions

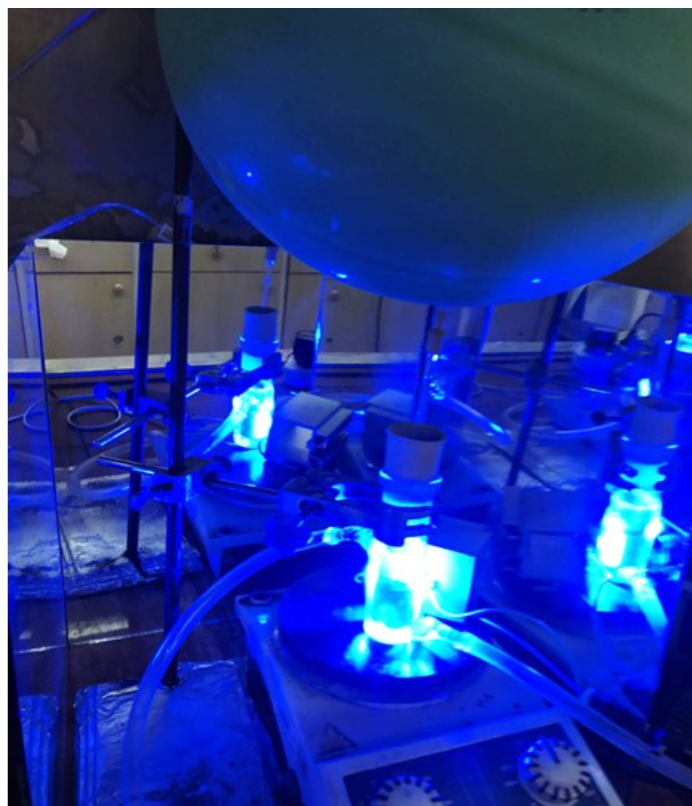

## S3: Procedures for the oxidation of different sulfides and characterization of the oxidation products

**Methyl phenyl sulfoxide:** Methyl phenyl sulfide (409.20 mg, 3.3 mmol) was performed according to the general procedure using H<sub>2</sub>TPP@nanoAmb (0.66 × 10<sup>-3</sup> mmol). Crude material

was separated by TLC on silica gel plates (ethyl acetate and n-hexane in a 1:4 volume ratio) to give Methyl phenyl sulfoxide; yield: 92%.  $^1\text{H}$  NMR (400 MHz,  $\text{CDCl}_3$ ):  $\delta$ = 7.56–7.38 (m, 5H), 2.61 (s, 3H).

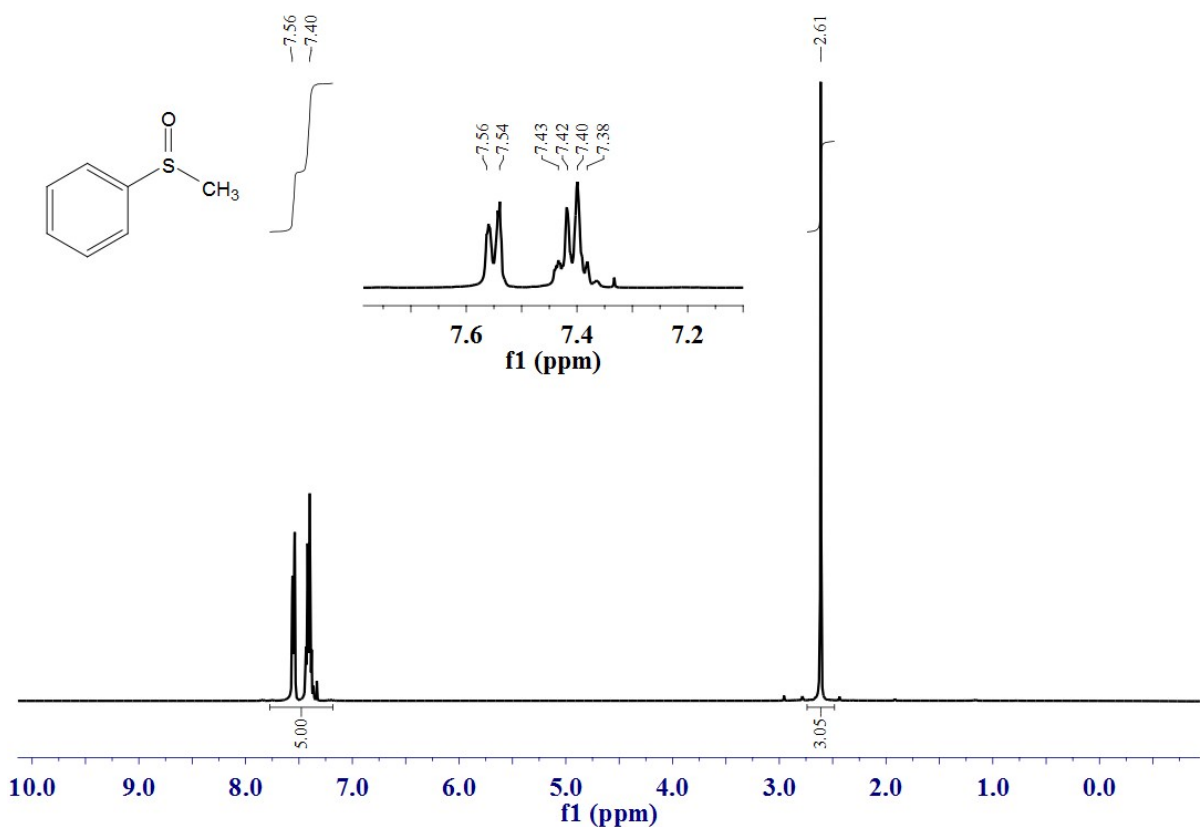

**Ethyl phenyl sulfoxide:** Ethyl phenyl sulfide (465.18 mg, 3.3 mmol) was performed according to the general procedure using  $\text{H}_2\text{TPP}@_{\text{nanoAmb}}$  ( $0.66 \times 10^{-3}$  mmol). Crude material was separated by TLC on silica gel plates (ethyl acetate and n-hexane in a 1:4 volume ratio) to give Ethyl phenyl sulfoxide; yield: 97%.  $^1\text{H}$  NMR (400 MHz,  $\text{CDCl}_3$ ):  $\delta$ = 7.60–7.45 (m, 4H), 2.91–2.82 (m, 1H), 2.77–2.68 (m, 1H), 1.15 (t, 3H).

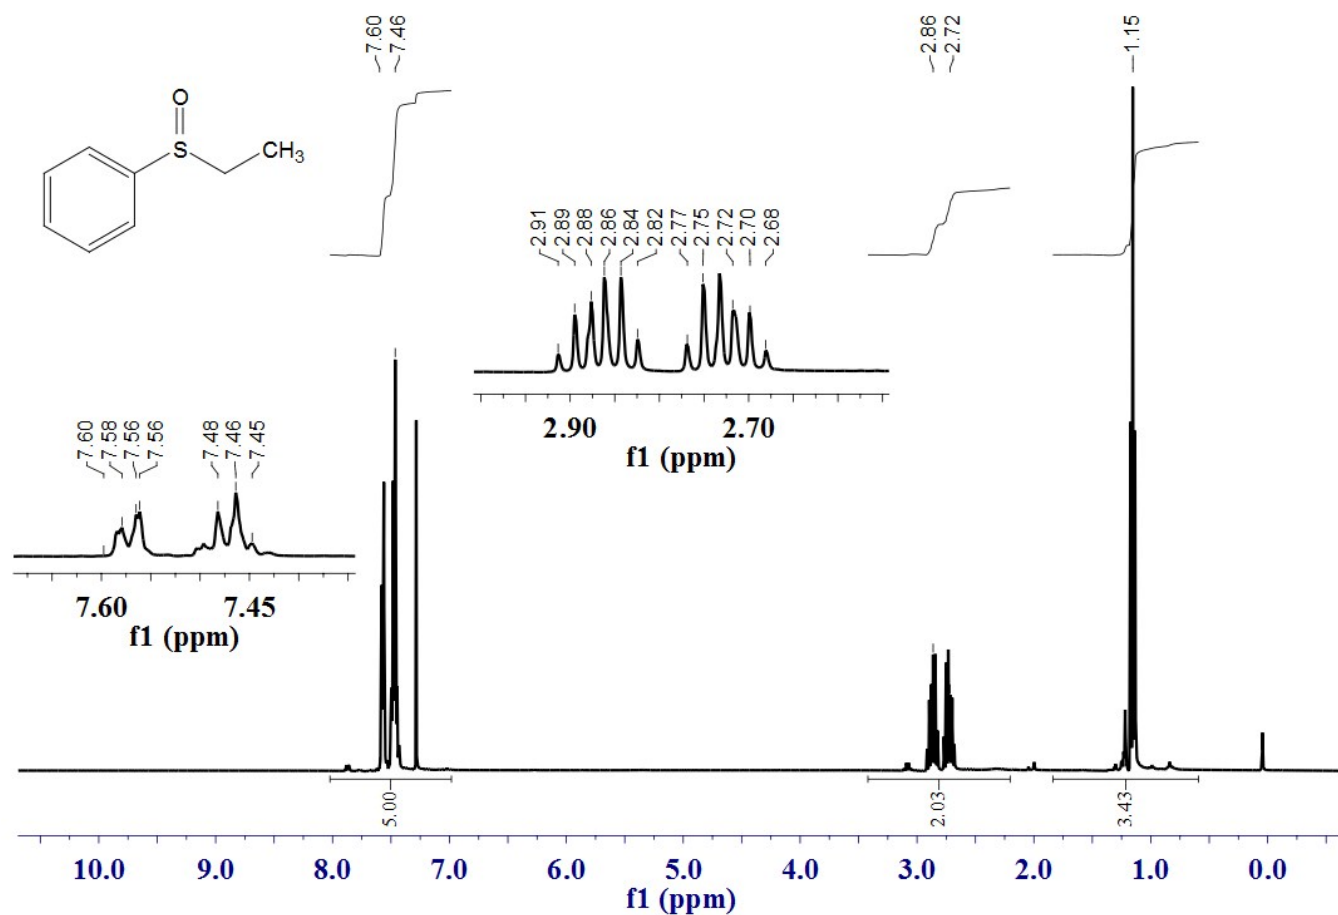

**4-Chlorophenyl methyl sulfoxide:** 4-Chlorophenyl methyl sulfide (675.16 mg, 3.3 mmol) was performed according to the general procedure using H<sub>2</sub>TPP@nanoAmb ( $0.66 \times 10^{-3}$  mmol). Crude material was separated by TLC on silica gel plates (ethyl acetate and n-hexane in a 1:4 volume ratio) to give 4-Chlorophenyl methyl sulfoxide; yield: 99%. <sup>1</sup>H NMR (400 MHz, CDCl<sub>3</sub>):  $\delta$  = 7.57-7.55 (m, 2H), 7.47-7.45 (m, 2H), 2.69 (s, 3H).

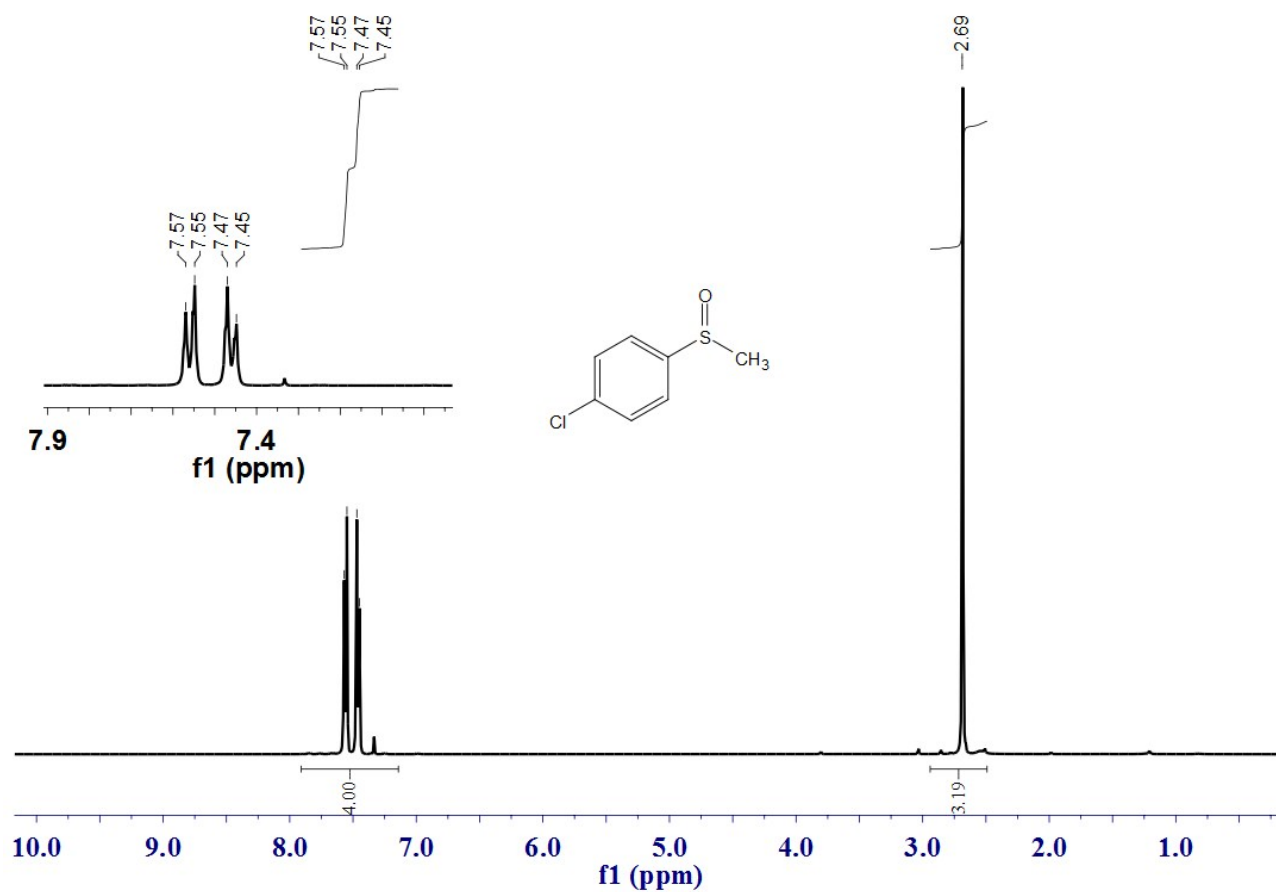

**4-Methoxyphenyl methyl sulfoxide:** 4-Methoxyphenyl methyl sulfide (564.83 mg, 3.3mmol) was performed according to the general procedure using  $\text{H}_2\text{TPP@nanoAmb}$  ( $0.66 \times 10^{-3}$  mmol). Crude material was separated by TLC on silica gel plates (ethyl acetate and n-hexane in a 1:4 volume ratio) to give 4-Methoxy phenyl sulfoxide; yield: 95%.  $^1\text{H}$  NMR (400 MHz,  $\text{CDCl}_3$ ):  $\delta$ = 7.42 (d, 2H), 6.85 (d, 2H), 3.65 (s, 3H), 2.51 (s, 3H).

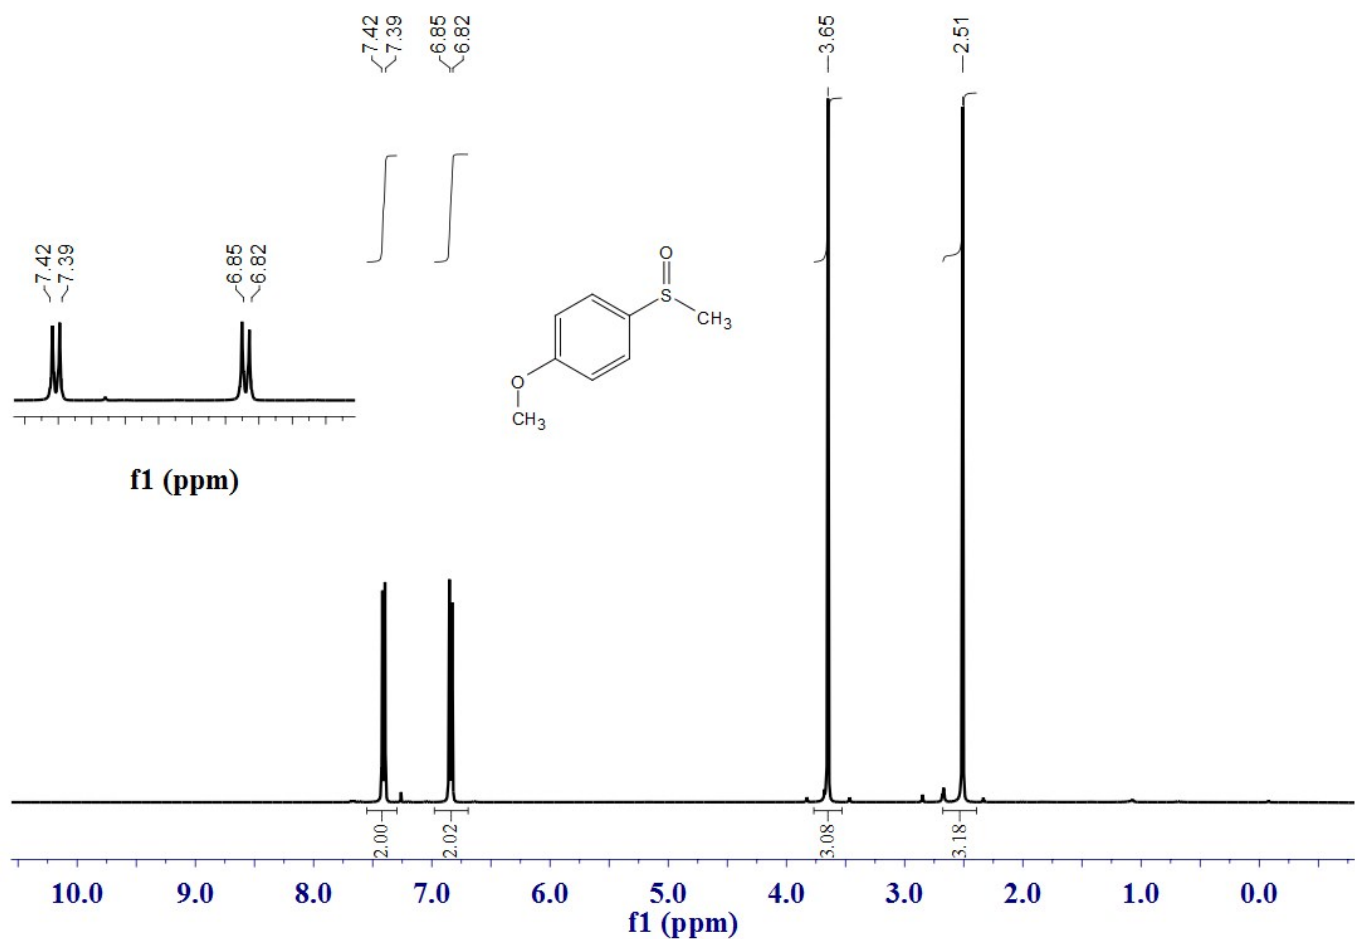

**4-Cyanophenyl methyl sulfoxide:** 4-Cyano phenyl methyl sulfide (492.36 mg, 3.3 mmol) was performed according to the general procedure using H<sub>2</sub>TPP@nanoAmb ( $0.66 \times 10^{-3}$  mmol). Crude material was separated by TLC on silica gel plates (ethyl acetate and n-hexane in a 1:4 volume ratio) to give 4-Cyanophenyl methyl sulfoxide; yield: 93%. <sup>1</sup>H NMR (400 MHz, CDCl<sub>3</sub>):  $\delta$  = 7.82-7.80 (m, 2H), 7.75-7.73 (m, 2H), 2.74 (s, 3H).

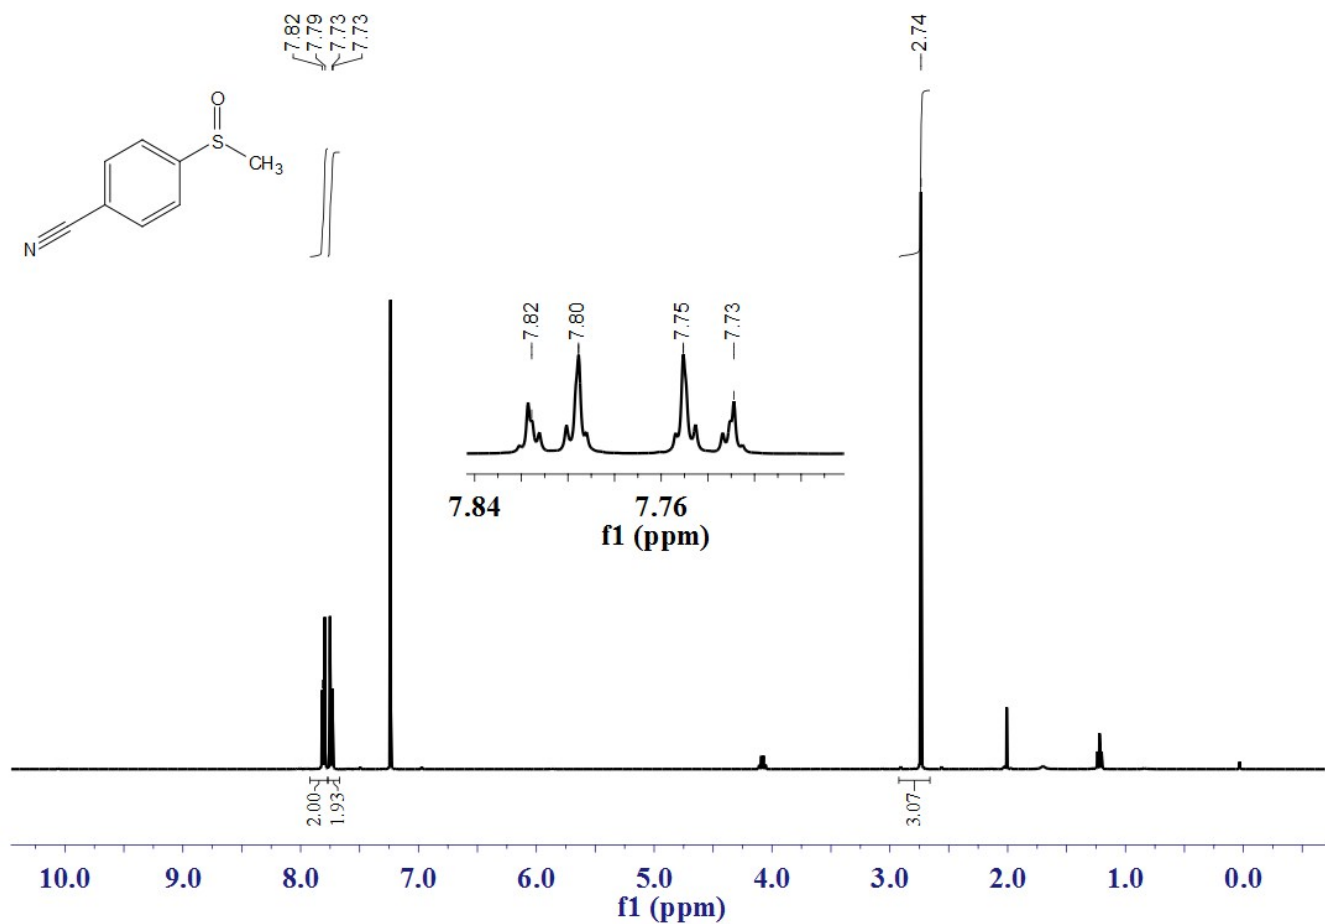

**1-methyl 4- methyl phenyl sulfoxide:** 1-methyl 4- methyl phenyl sulfide (468.47 mg, 3.3 mmol) was performed according to the general procedure using H<sub>2</sub>TPP@nanoAmb ( $0.66 \times 10^{-3}$  mmol). Crude material was separated by TLC on silica gel plates (ethyl acetate and n-hexane in a 1:4 volume ratio) to give 1-methyl 4- methyl phenyl sulfoxide; yield: 99%. <sup>1</sup>H NMR (400 MHz, CDCl<sub>3</sub>):  $\delta$ = 7.46-7.44 (d, 2H), 7.24-7.22 (d, 2H), 2.63 (s, 3H), 2.33 (s, 3H).



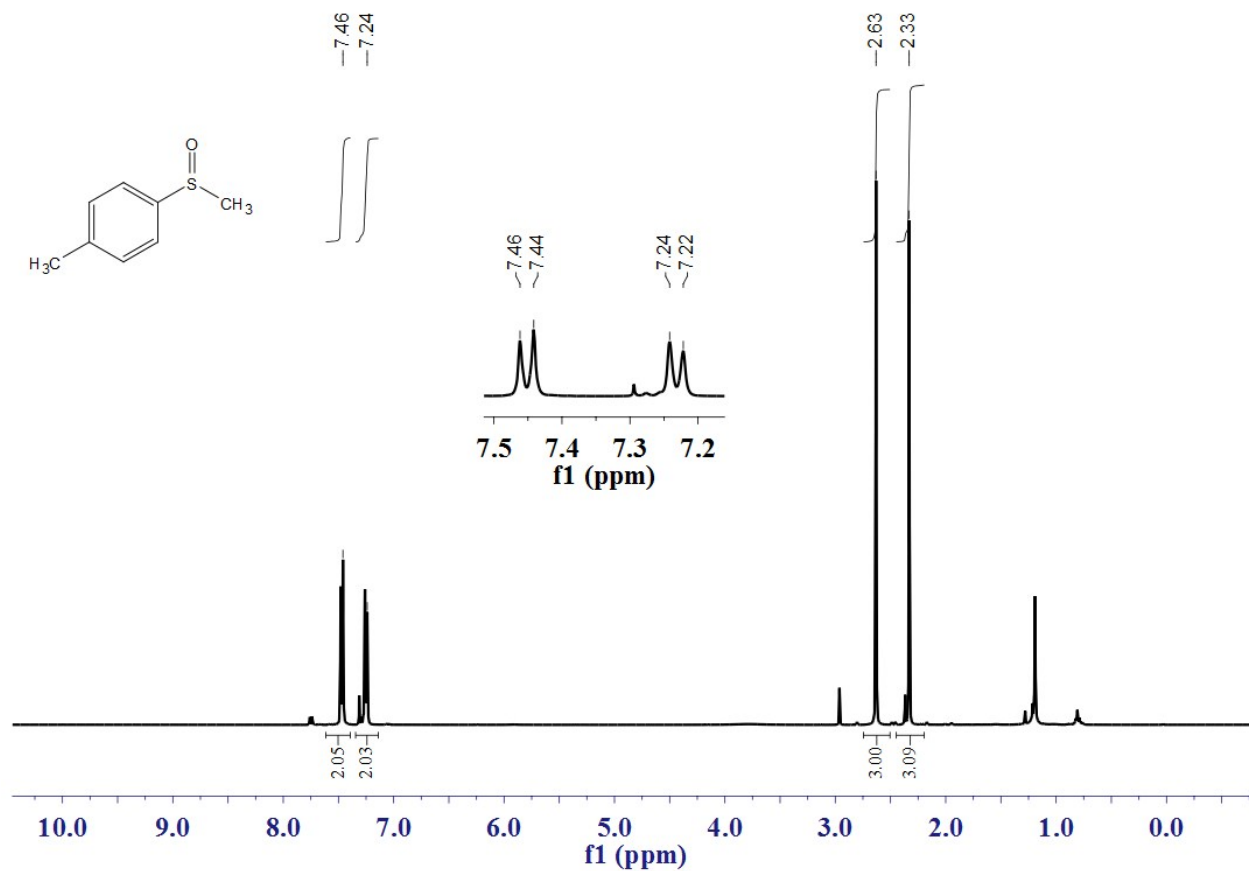

**4-Fluorophenyl methyl sulfoxide:** 4-Fluorophenyl methyl sulfide (797.74 mg, 3.3 mmol) was performed according to the general procedure using H<sub>2</sub>TPP@nanoAmb ( $0.66 \times 10^{-3}$  mmol). Crude material was separated by TLC on silica gel plates (ethyl acetate and n-hexane in a 1:4 volume ratio) to give 4-Fluorophenyl methyl sulfoxide; yield: 99%. <sup>1</sup>H NMR (400 MHz, CDCl<sub>3</sub>):  $\delta$ = 7.68-7.64 (m, 2H), 7.28-7.21 (m, 2H), 2.72 (s, 3H).

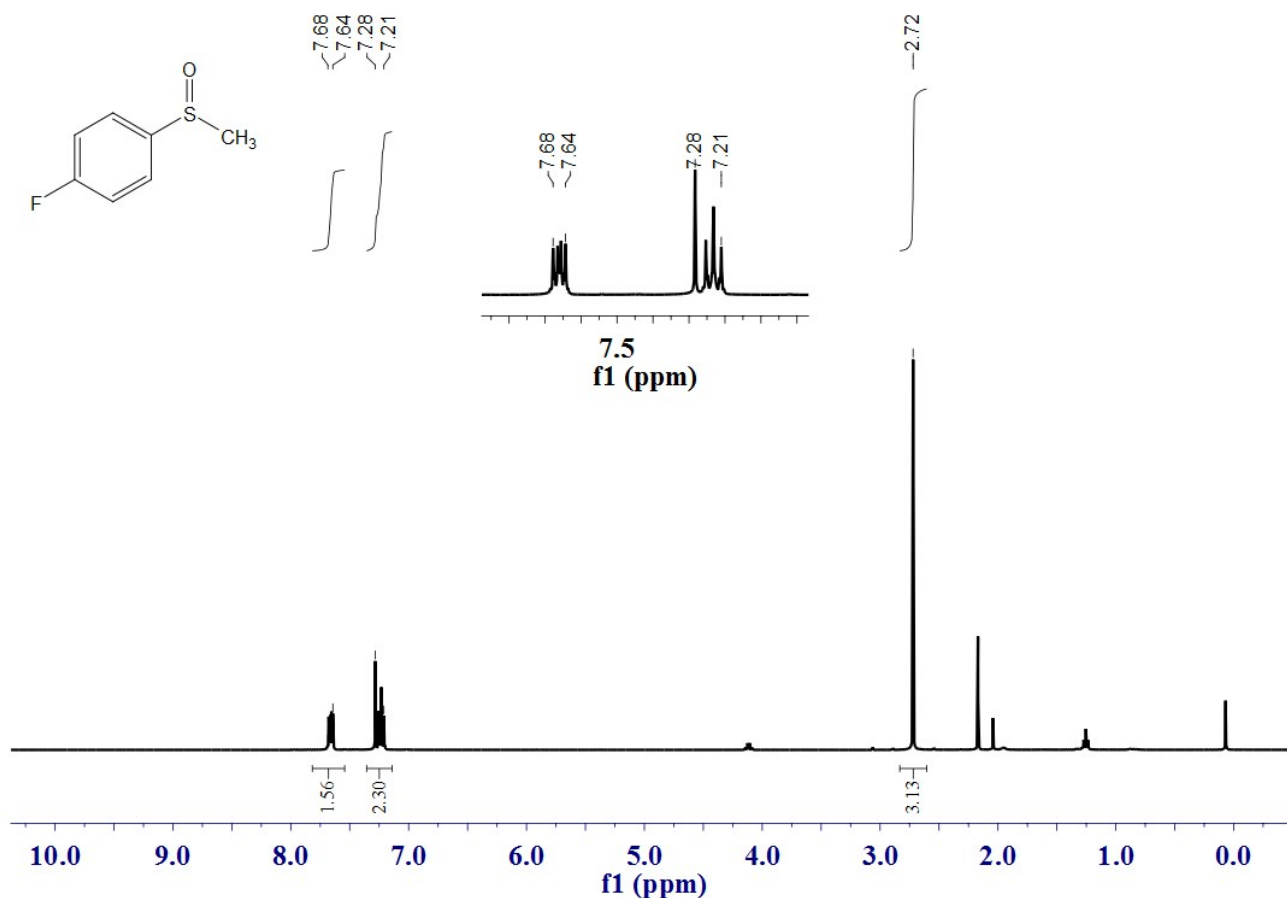

**2-Chlorophenyl methyl sulfoxide:** 2-Chlorophenyl methyl sulfide (675.16 mg, 3.3 mmol) was performed according to the general procedure using H<sub>2</sub>TPP@nanoAmb ( $0.66 \times 10^{-3}$  mmol). Crude material was separated by TLC on silica gel plates (ethyl acetate and n-hexane in a 1:4 volume ratio) to give 2-Chlorophenyl methyl sulfoxide; yield: 99%. <sup>1</sup>H NMR (400 MHz, CDCl<sub>3</sub>):  $\delta$ = 7.87-7.88 (d, 1H), 7.47-7.34 (m, 2H), 7.31-7.29 (m, 1H), 2.74 (s, 3H).

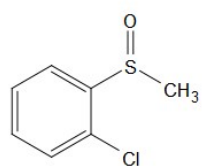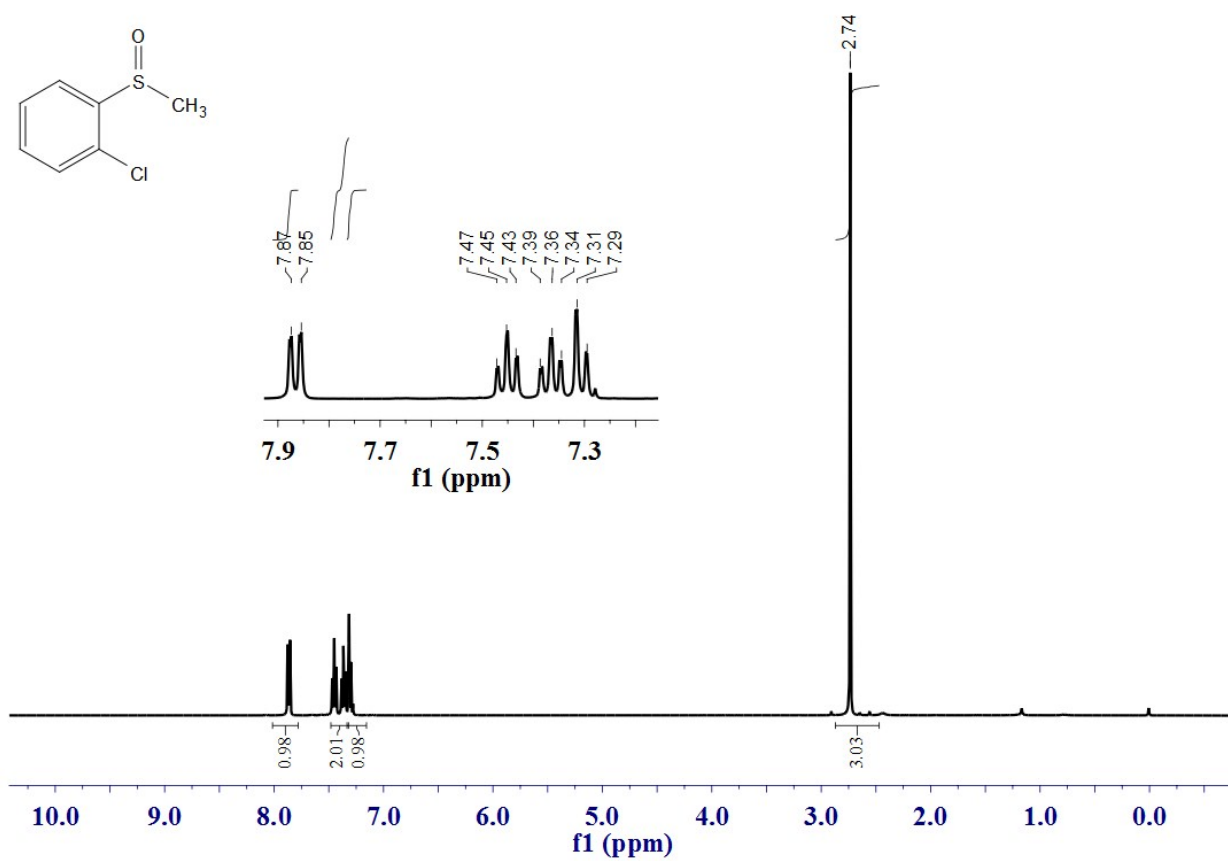

**Diallyl sulfoxide:** Dibutyl sulfide (335.40 mg, 3.3 mmol) was performed according to the general procedure using H<sub>2</sub>TPP@nanoAmb ( $0.66 \times 10^{-3}$  mmol). Crude material was separated by TLC on silica gel plates (ethyl acetate and n-hexane in a 1:4 volume ratio) to give Diallyl sulfoxide; yield: 97%. <sup>1</sup>H NMR (400 MHz, CDCl<sub>3</sub>):  $\delta$  = 5.94-5.83 (m, 2H), 5.46-5.35 (m, 4H), 3.55-3.37 (d, 4H).

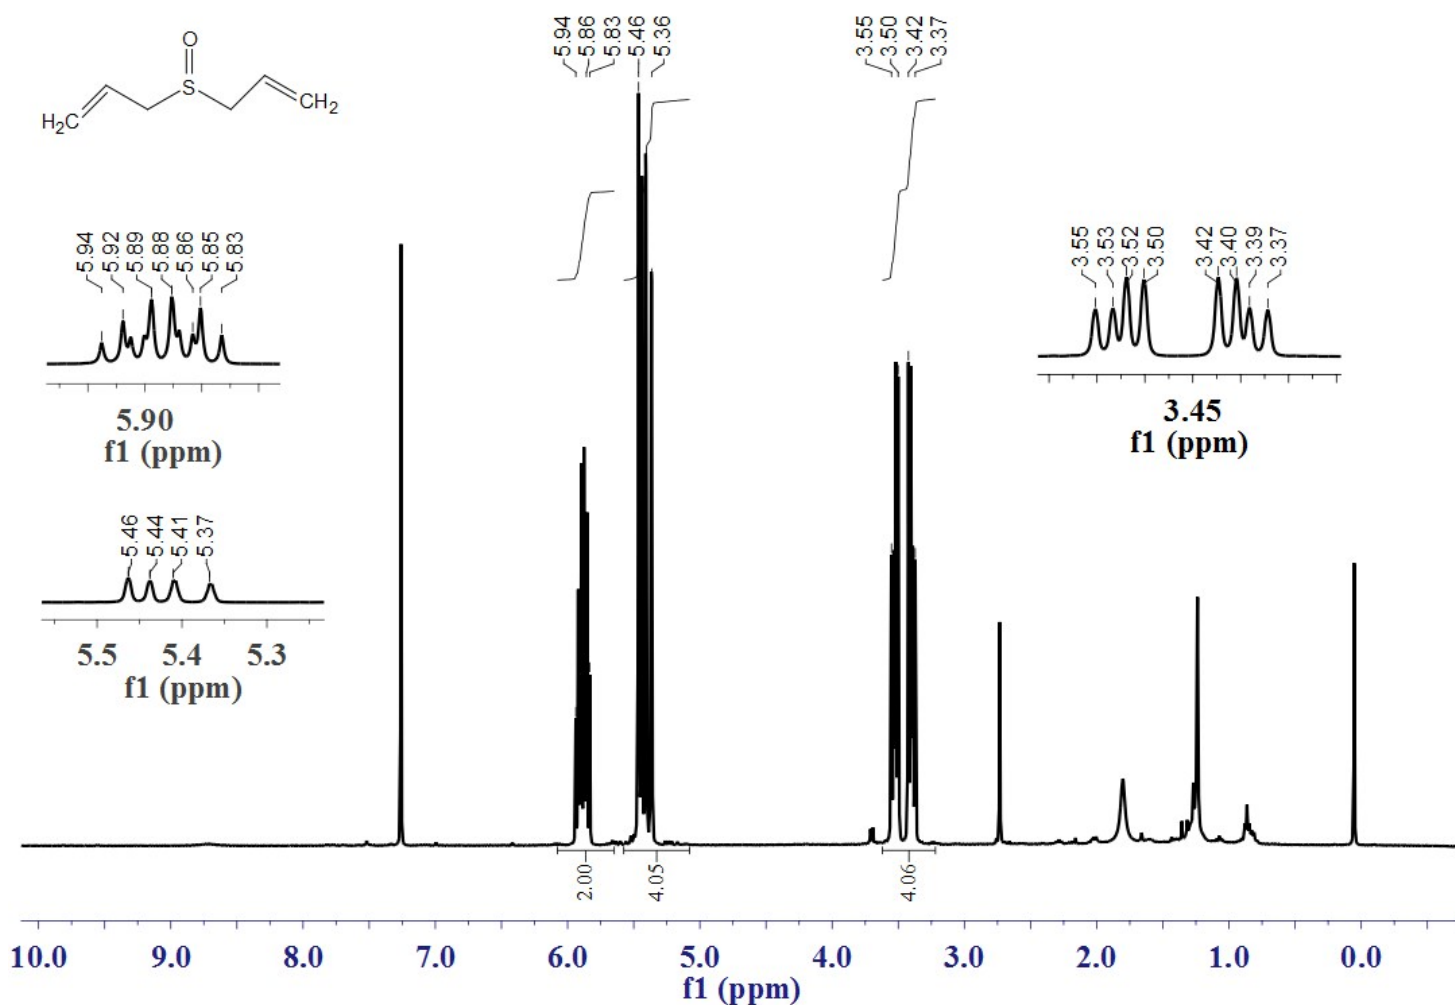

**Dibutyl sulfoxide:** Dibutyl sulfide (405.54 mg, 3.3 mmol) was performed according to the general procedure using H<sub>2</sub>TPP@nanoAmb (0.66 × 10<sup>-3</sup> mmol). Crude material was separated by TLC on silica gel plates (ethyl acetate and n-hexane in a 1:4 volume ratio) to give Dibutyl sulfoxide; yield: 70%. <sup>1</sup>H NMR (400 MHz, CDCl<sub>3</sub>): δ= 2.72-2.59 (m, 4H), 1.78- 1.70 (m, 4H), 1.55-1.40 (m, 4H), 0.94 (t, 6H).

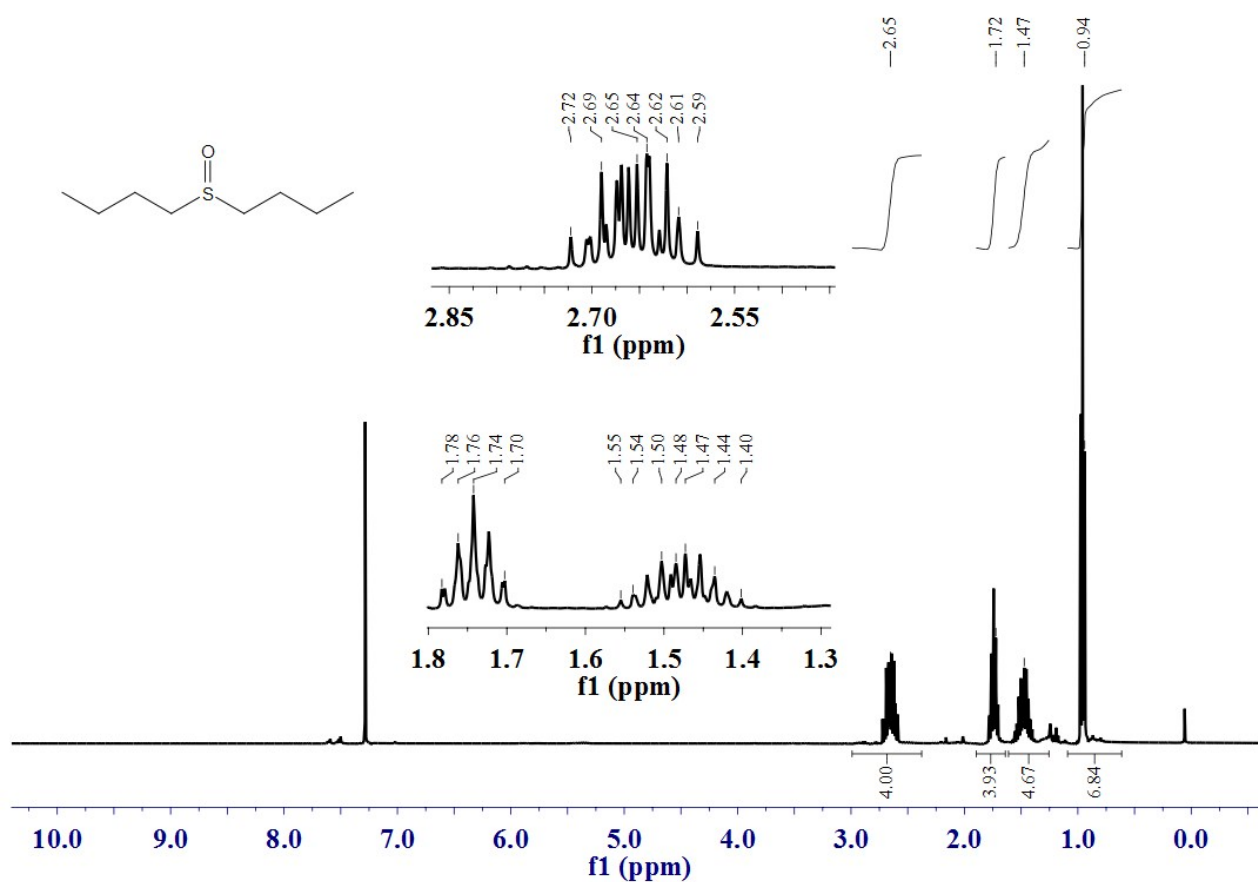

**Benzyl phenyl sulfoxide:** Benzyl phenyl sulfide (660.99 mg, 3.3 mmol) was performed according to the general procedure using H<sub>2</sub>TPP@nanoAmb ( $0.66 \times 10^{-3}$  mmol). Crude material was separated by TLC on silica gel plates (ethyl acetate and n-hexane in a 1:4 volume ratio) to give Benzyl phenyl sulfoxide; yield: 75%. <sup>1</sup>H NMR (400 MHz, CDCl<sub>3</sub>):  $\delta$ = 7.437-7.7.22 (m, 8H), 6.97 (d, 2H), 4.07-4.04 (d, 1H), 3.99-3.96 (d, 1H).

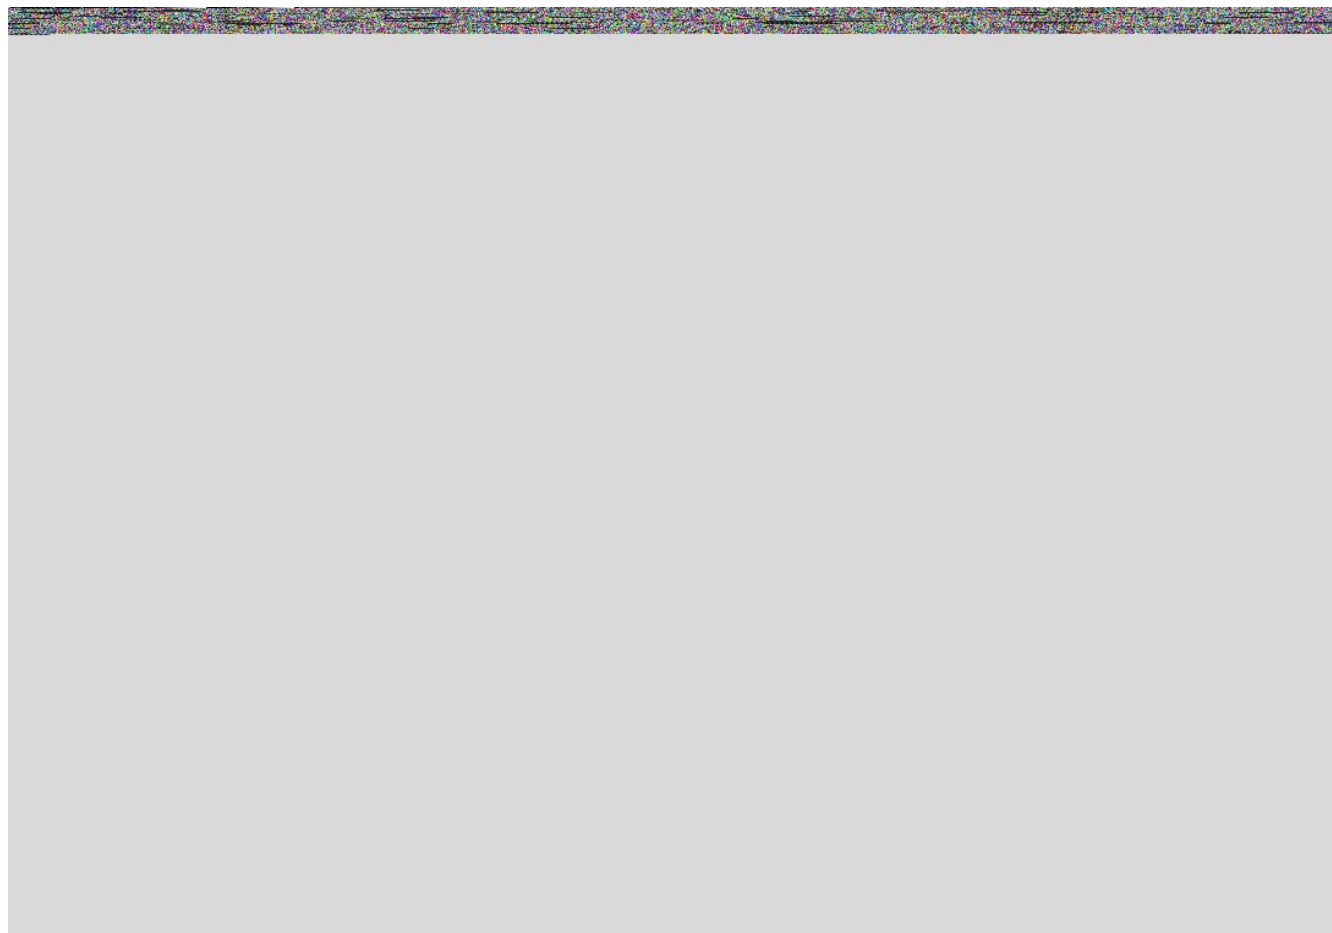



**S5.** The change in the UV–vis spectrum of DPBF upon irradiation with a 10W red LED lamp in the presence of the immobilized porphyrins.

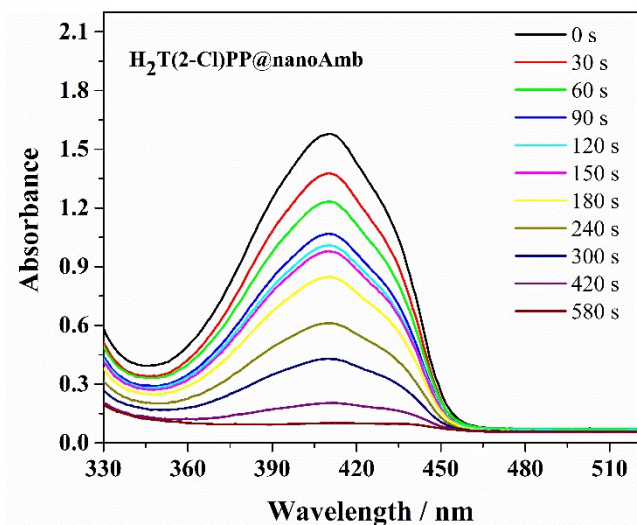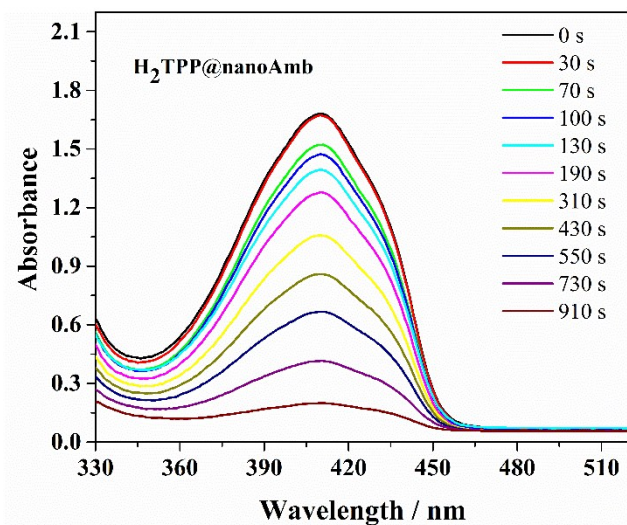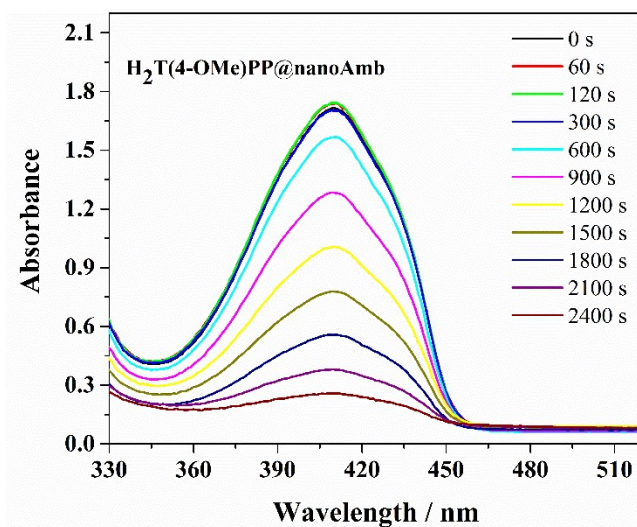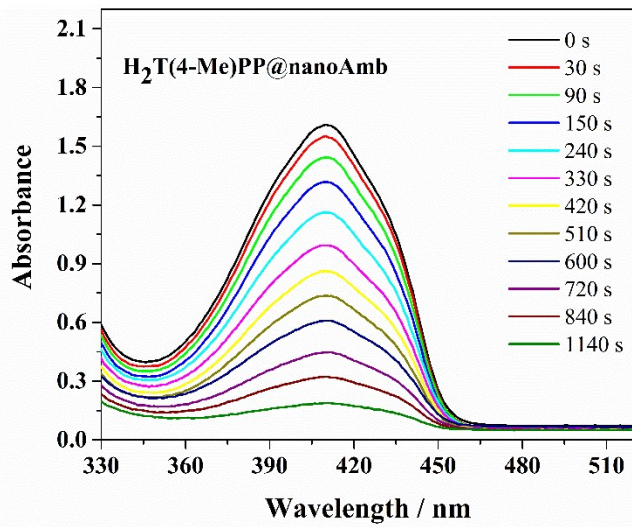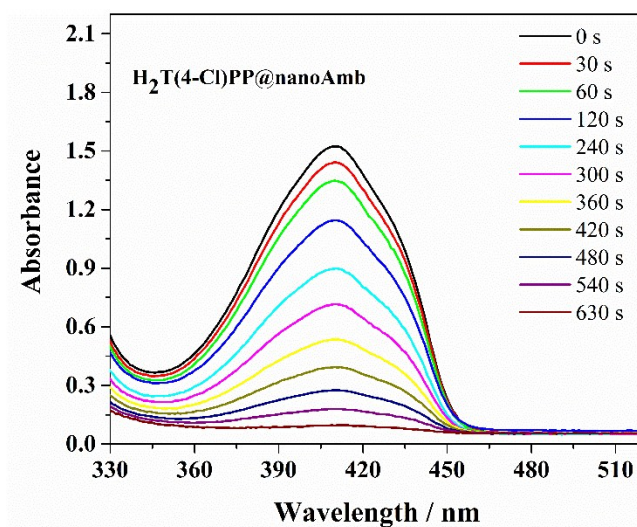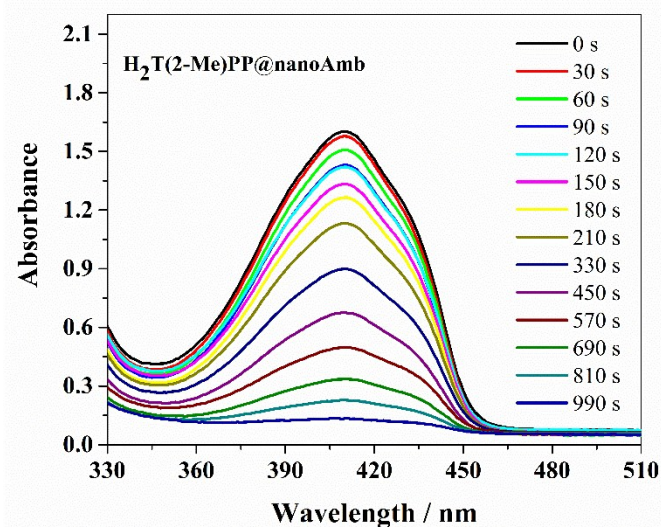

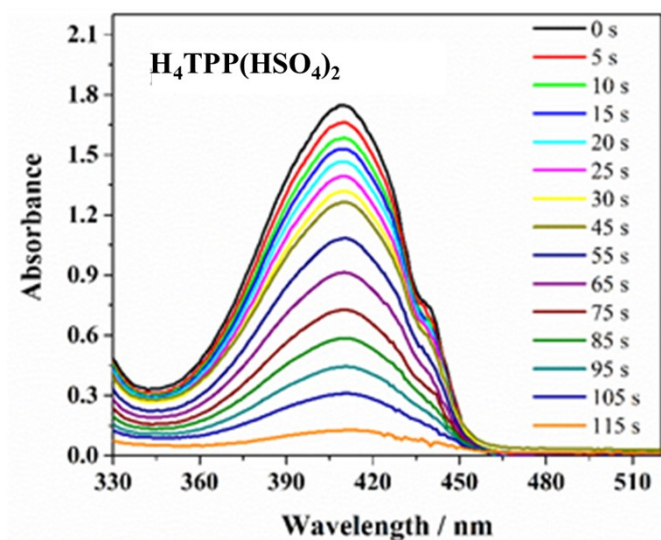

**S6.** Photooxidation of different sulfides by  $\text{H}_2\text{TPP}@ \text{nanoAmb.}^{\text{a}}$

| Substrate | Product | Conversion <sup>b</sup><br>[Selectivity](%) | TON [TOF(h <sup>-1</sup> )] |
|-----------|---------|---------------------------------------------|-----------------------------|
|           |         | 99 [100]                                    | 4950 [1650]                 |
|           |         | 75 [100]                                    | 3750 [1250]                 |
|           |         | 70 [100]                                    | 3500 [1166]                 |
|           |         | 97 [100]                                    | 4850 [1616]                 |

<sup>a</sup> The catalyst and substrate were used in 1:5000 molar ratio. A 20 W white LED lamp was used as the light source. <sup>b</sup> For a reaction time of 3 h in 1:1 acetonitrile (5 mL)/ water (5 mL) solvent mixture.
